# Supplementary material for: Rutin, γ-Aminobutyric Acid, Gallic Acid, and Caffeine Negatively Affect the Sweet-Mellow Taste of Congou Black Tea Infusions
Source: PubMed Central journal article supplement (PMC6930661; doi:10.3390/molecules24234221), 2019-11-20
Supplement: molecules-24-04221-s001.pdf [file molecules-24-04221-s001.pdf]

## **Supplementary materials for publication**

### **Rutin, $\gamma$ -Aminobutyric Acid, Gallic acid and Caffeine Negatively Affect the Sweet-Mellow Taste of Congou Black Tea Infusions**

Jia Li<sup>a</sup>, Yuefeng Yao<sup>a,b</sup>, Jiaqin Wang<sup>a,b</sup>, Jinjie Hua<sup>a</sup>, Jinjin Wang<sup>a</sup>, Yanqin Yang<sup>a</sup>,  
Chunwang Dong<sup>a</sup>, Qinghua Zhou<sup>c</sup>, Yongwen Jiang<sup>a</sup>, Yuliang Deng<sup>a,\*</sup>, Haibo Yuan<sup>a,\*</sup>

<sup>a</sup> Key Laboratory of Tea Biology and Resources Utilization, Ministry of Agriculture,  
Tea Research Institute, Chinese Academy of Agricultural Sciences, Hangzhou 310008  
China

<sup>b</sup> Graduate School of Chinese Academy of Agricultural Sciences, Beijing 100081 China

<sup>c</sup> Key Laboratory of Microbial Technology for Industrial Pollution Control of Zhejiang  
Province, College of Environment, Zhejiang University of Technology, Hangzhou  
310014 China

\* Correspondence should be addressed to:

\* Yuliang Deng, Email: donny@tricaas.com

\* Prof. Haibo Yuan, Email: 192168092@tricaas.com

**Table S1** Detailed information of enrolled 33 congou black tea samples including their producing area, taste descriptions of corresponding tea infusions evaluated by human panelist, and grouping information.

| <b>Nr.</b> | <b>Producing Area</b> | <b>Taste Description</b>        | <b>Group</b> |
|------------|-----------------------|---------------------------------|--------------|
| 1          | Hangzhou, Zhejiang    | mellow, sweet, brisk            | group I      |
| 2          | Hangzhou, Zhejiang    | mellow, sweet                   | group I      |
| 3          | Hangzhou, Zhejiang    | mellow, sweet, brisk            | group I      |
| 4          | Hangzhou, Zhejiang    | mellow, sweet                   | group I      |
| 5          | Yichang, Hubei        | ripe, stale, a bit sour         | group III    |
| 6          | Yichang, Hubei        | ripe, stale                     | group III    |
| 7          | Hangzhou, Zhejiang    | mellow, pure, mild,             | group II     |
| 8          | Lincang, Yunnan       | mellow, sweet                   | group I      |
| 9          | Qimen, Anhui          | ripe, stuffy                    | group III    |
| 10         | Qimen, Anhui          | mellow, mild                    | group II     |
| 11         | Qimen, Anhui          | a bit sour                      | group III    |
| 12         | Qimen, Anhui          | mellow, sweet                   | group I      |
| 13         | Enshi, Hubei          | mellow, pure, mild              | group II     |
| 14         | Lishui, Zhejiang      | mellow, sweet, fruity           | group I      |
| 15         | Lishui, Zhejiang      | mellow, thick                   | group II     |
| 16         | Yibin, Sichuan        | mellow, brisk                   | group II     |
| 17         | Yibin, Sichuan        | sour                            | group III    |
| 18         | Yibin, Sichuan        | mellow, a bit high-fired        | group II     |
| 19         | Yibin, Sichuan        | sour, stale                     | group III    |
| 20         | Lincang, Yunnan       | mellow, sweet, brisk            | group I      |
| 21         | Lincang, Yunnan       | sour, a bit smoky               | group III    |
| 22         | Yichang, Hubei        | mellow, pure                    | group II     |
| 23         | Yichang, Hubei        | mellow, sweet                   | group I      |
| 24         | Yichang, Hubei        | mellow, sweet, brisk            | group I      |
| 25         | Yichang, Hubei        | mellow, brisk                   | group II     |
| 26         | Yichang, Hubei        | mellow, brisk                   | group II     |
| 27         | Yichang, Hubei        | mellow, brisk                   | group II     |
| 28         | Yichang, Hubei        | mellow, a bit high-fired        | group II     |
| 29         | Yichang, Hubei        | mellow, thick, a bit high-fired | group II     |
| 30         | Yichang, Hubei        | sour                            | group III    |
| 31         | Yichang, Hubei        | mellow, sweet, a bit high-fired | group I      |
| 32         | Yichang, Hubei        | mellow, brisk                   | group II     |
| 33         | Yichang, Hubei        | mellow, thick                   | group II     |

**Table S2** Detailed information of the CAS number, supplier and purity of all the standards used in this study.

| compound                              | CAS number  | origin                                  | purity                             |
|---------------------------------------|-------------|-----------------------------------------|------------------------------------|
| epigallocatechin, EGC                 | 970-74-1    | Yuanye bio-technology (Shanghai, China) | HPLC $\geq$ 98%                    |
| catechin, C                           | 154-23-4    | ZZBIO (Shanghai, China)                 | HPLC $\geq$ 95%                    |
| epigallocatechin gallate, EGCG        | 989-51-5    | ZZBIO (Shanghai, China)                 | 98%                                |
| epicatechin, EC                       | 490-46-0    | Yuanye bio-technology (Shanghai, China) | HPLC $\geq$ 98%                    |
| galocatechin gallate, GCG             | 4233-96-9   | ZZBIO (Shanghai, China)                 | 98%                                |
| epicatechin gallate, ECG              | 1257-08-5   | ZZBIO (Shanghai, China)                 | HPLC $\geq$ 98%                    |
| theaflavin, TF                        | 4670-05-7   | ZZBIO (Shanghai, China)                 | HPLC $\geq$ 98%                    |
| theaflavin-3-gallate, TF-3-G          | 30462-34-1  | Yuanye bio-technology (Shanghai, China) | HPLC $\geq$ 98%                    |
| theaflavin-3'-gallate, TF-3'-G        | 28543-07-9  | ZZBIO (Shanghai, China)                 | HPLC $\geq$ 98%                    |
| theaflavin-3,3'-digallate, TF-3,3'-DG | 33377-72-9  | ZZBIO (Shanghai, China)                 | HPLC $\geq$ 98%                    |
| phospho-L-serine                      | 407-41-0    | Sigma-Aldrich (St Louis, USA)           | certified reference material grade |
| L-aspartic acid                       | 56-84-8     | Yuanye bio-technology (Shanghai, China) | HPLC $\geq$ 99%                    |
| L-threonine                           | 72-19-5     | Yuanye bio-technology (Shanghai, China) | HPLC $\geq$ 98%                    |
| L-serine                              | 56-45-1     | Yuanye bio-technology (Shanghai, China) | HPLC $\geq$ 98%                    |
| L-asparagine                          | 70-47-3     | Yuanye bio-technology (Shanghai, China) | HPLC $\geq$ 98%                    |
| L-glutamic acid                       | 56-86-0     | Yuanye bio-technology (Shanghai, China) | HPLC $\geq$ 99%                    |
| L-theanine                            | 3081-61-6   | Yuanye bio-technology (Shanghai, China) | HPLC $\geq$ 98%                    |
| L-proline                             | 147-85-3    | Yuanye bio-technology (Shanghai, China) | HPLC $\geq$ 99%                    |
| L-glycine                             | 56-40-6     | Yuanye bio-technology (Shanghai, China) | HPLC $\geq$ 99%                    |
| L-alanine                             | 56-41-7     | Yuanye bio-technology (Shanghai, China) | HPLC $\geq$ 98%                    |
| $\alpha$ -aminobutyric acid           | 2835-81-6   | Yuanye bio-technology (Shanghai, China) | $\geq$ 98%                         |
| L-valine                              | 72-18-4     | Yuanye bio-technology (Shanghai, China) | HPLC $\geq$ 98%                    |
| L-cystine                             | 56-89-3     | Yuanye bio-technology (Shanghai, China) | HPLC $\geq$ 99%                    |
| L-methionine                          | 63-68-3     | Yuanye bio-technology (Shanghai, China) | HPLC $\geq$ 98%                    |
| L-isoleucine                          | 73-32-5     | Yuanye bio-technology (Shanghai, China) | HPLC $\geq$ 98%                    |
| L-leucine                             | 61-90-5     | Yuanye bio-technology (Shanghai, China) | HPLC $\geq$ 98%                    |
| L-tyrosine                            | 60-18-4     | Yuanye bio-technology (Shanghai, China) | HPLC $\geq$ 99%                    |
| $\gamma$ -aminobutyric acid, GABA     | 56-12-2     | Yuanye bio-technology (Shanghai, China) | HPLC $\geq$ 99%                    |
| L-histidine                           | 71-00-1     | Yuanye bio-technology (Shanghai, China) | HPLC $\geq$ 98%                    |
| L-tryptophan                          | 73-22-3     | Yuanye bio-technology (Shanghai, China) | HPLC $\geq$ 98%                    |
| L-ornithine                           | 3184-13-2   | Yuanye bio-technology (Shanghai, China) | HPLC $\geq$ 98%                    |
| L-lysine                              | 56-87-1     | Yuanye bio-technology (Shanghai, China) | HPLC $\geq$ 98%                    |
| L-arginine                            | 74-79-3     | Yuanye bio-technology (Shanghai, China) | HPLC $\geq$ 98%                    |
| vitexin-4''-O-glucoside               | 178468-00-3 | Yuanye bio-technology (Shanghai, China) | HPLC $\geq$ 95%                    |
| myricetin 3-O-galactoside             | 15648-86-9  | Yuanye bio-technology (Shanghai, China) | HPLC $\geq$ 98%                    |
| vitexin-2-O-rhamnoside                | 64820-99-1  | Yuanye bio-technology (Shanghai, China) | HPLC $\geq$ 98%                    |
| quercetin-3-O-rutinoside, rutin       | 153-18-4    | J&K scientific (Beijing, China)         | 98%                                |
| quercetin-3-O-glucoside               | 482-35-9    | J&K scientific (Beijing, China)         | 98%                                |
| kaempferol-3-O-rutinoside             | 17650-84-9  | J&K scientific (Beijing, China)         | 98%                                |

|                                   |           |                                         |                                    |
|-----------------------------------|-----------|-----------------------------------------|------------------------------------|
| kaempferol-3- <i>O</i> -glucoside | 480-10-4  | J&K scientific (Beijing, China)         | 98%                                |
| succinic acid                     | 110-15-6  | Yuanye bio-technology (Shanghai, China) | HPLC $\geq$ 98%                    |
| oxalic acid                       | 144-62-7  | Yuanye bio-technology (Shanghai, China) | HPLC $\geq$ 98%                    |
| malic acid                        | 6915-15-7 | Yuanye bio-technology (Shanghai, China) | HPLC $\geq$ 98%                    |
| citric acid                       | 77-92-9   | Yuanye bio-technology (Shanghai, China) | HPLC $\geq$ 98%                    |
| glucose                           | 50-99-7   | Jinsui biotechnology (Shanghai, China)  | purity>99.8%                       |
| sucrose                           | 57-50-1   | J&K scientific (Beijing, China)         | 99%, analytical grade              |
| gallic acid                       | 149-91-7  | J&K scientific (Beijing, China)         | 99%, analytical grade              |
| caffeine                          | 58-08-2   | Sigma-Aldrich (St Louis, USA)           | certified reference material grade |

---

### **Detailed technical aspects of tea sensory evaluation**

The sensory evaluation was performed in a clean, bright and quiet tasting room which is 15 m<sup>2</sup> large and is kept at 22 °C. All congou black samples were served in random order and coded with only regular numbers 1, 2, 3..., without further detailed information. All the panelists had no prior knowledge of these tested tea samples. For evaluation of each tea sample, a unified pack including a cup with a cover, a bowl and a spoon was used. All of them are white porcelain. The cup is cylindrical shaped and its size is height 65 mm, outside diameter 66 mm, inside diameter 62 mm, volume 150 mL. The bowl size is height 55 mm, volume 250 mL. At the mouth of the cup, there are three very small, zigzag shaped openings, for filtering of tea infusions into the bowl while keeping the leaves in the cup. Each tea sample was brewed in the cup with cover, then the tea infusion was filtered and transferred to the bowl for evaluation of tea taste. To make sure the reliability of the evaluation result, one tea sample was pre-selected from the experimental collection and brewed three times to make three replicates of tea infusions. These three infusions were set as blind samples and subjected to evaluation, along with other samples.

### Analysis of free amino acids

The free amino acids were determined by high-performance cation-exchange chromatography with postcolumn derivatization, using an automatic amino acid analyzer (S-433D, Sykam, Germany) equipped with a cation separation LCAK07/Li column (4.6 mm×150 mm, Sykam). The mobile phase included buffer A (lithium citrate buffer: 5% (v/v) methanol with 5.04 g/L LiOH hydrate, 15 g/L citric acid, 0.01% (v/v) octanoic acid and 0.78% (v/v) of 37% HCL), buffer B (lithium citrate buffer: Water with 4.2 g/L LiCl, 8.4 g/L LiOH hydrate, 15 g/L citric acid, 0.01% (v/v) octanoic acid and 0.86% (v/v) of 37% HCL) and buffer C (lithium citrate/borate buffer: Water with 10 g/L borate, 4.2 g/L LiCl, 8.4 g/L LiOH hydrate, 10 g/L citric acid, 0.01% (v/v) octanoic acid and 0.33% (v/v) of 37% HCL). The flow rate was 0.45 mL/min and column temperature was 37°C. The injection volume was 10 µL. The LC gradient runs as following.

| time/min | Buffer A/% | Buffer B/% | Buffer C/% |
|----------|------------|------------|------------|
| 0.00     | 100.0      | 0.0        | 0.0        |
| 8.00     | 100.0      | 0.0        | 0.0        |
| 9.00     | 77.0       | 23.0       | 0.0        |
| 30.00    | 77.0       | 23.0       | 0.0        |
| 42.00    | 54.0       | 46.0       | 0.0        |
| 63.00    | 0.0        | 100.0      | 0.0        |
| 67.00    | 0.0        | 0.0        | 100.0      |
| 76.00    | 0.0        | 0.0        | 100.0      |
| 80.00    | 0.0        | 0.0        | 87.0       |
| 82.00    | 0.0        | 0.0        | 87.0       |
| 84.00    | 0.0        | 0.0        | 76.0       |
| 97.00    | 0.0        | 0.0        | 76.0       |
| 97.10    | 0.0        | 0.0        | 0.0        |
| 103.00   | 0.0        | 0.0        | 0.0        |
| 103.10   | 100.0      | 0.0        | 0.0        |
| 123.00   | 100.0      | 0.0        | 0.0        |
| 123.10   | 100.0      | 0.0        | 0.0        |
| 123.20   | 100.0      | 0.0        | 0.0        |
